# Supplementary material for: miR-3156-5p Enhances Hypoxia-Induced Angiogenesis in Hepatocellular Carcinoma via Modulating the SOCS5/HIF-1α/VEGF Pathway
Source: Research Square preprint supplement (doi:10.21203/rs.3.rs-877301/v1), 2021-09-13
Supplement: Supplementary file 1 [file c0ec3b88afdb2c0b35621a2c.docx]

**Highlights:**

1. miR-3156-5p was up-regulated in hypoxia-induced HCC cells and endothelial cells .

2. miR-3156-5p heightened HCC cells’ proliferation and endothelial cells’ tube formation.

3. Overexpressing SOCS5 reduced HCC cell proliferation.

4. Overexpressing miR-3156-5p facilitated angiogenesis and tumor growth *in vivo*.

5. SOCS5 was a direct target of miR-3156-5p
